# Supplementary material
Source: PubMed Central journal article supplement (PMC2862157)
Supplement: mmc1.pdf [file mmc1.pdf]

Biophysical Journal, Volume 98

**Supporting Material**

**Structural Refinement of a Key Tryptophan Residue in the BLUF Photoreceptor AppA by Ultraviolet Resonance Raman Spectroscopy**

Masashi Unno, Sadato Kikuchi, and Shinji Masuda

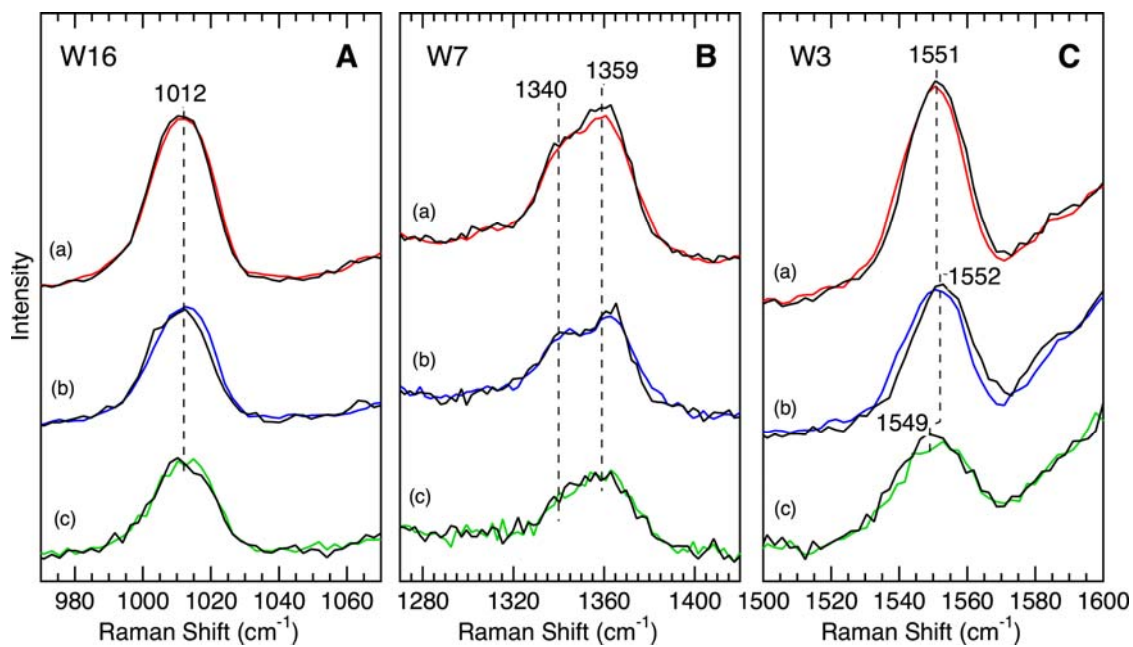

Fig. S1: Ultraviolet resonance Raman spectra of wild-type AppA126 and the W64F and W104A mutants in the (A) W16, (B) W7, and (C) W3 regions. (a) Wild-type AppA126 under the (black) and light (red) states; (b) the W64F mutant under the (black) and light (blue) states; (c) the W104A mutant under the (black) and light (green) states. The spectra were obtained at 224.3 nm excitation.
